# Supplementary material for: MicroRNA-4732-3p Is Dysregulated in Breast Cancer Patients with Cardiotoxicity, and Its Therapeutic Delivery Protects the Heart from Doxorubicin-Induced Oxidative Stress in Rats
Source: Antioxidants (Basel). 2022 Sep 30;11(10):1955. doi: 10.3390/antiox11101955 (PMC9599023; doi:10.3390/antiox11101955)
Supplement: Supplementary file 1 [file antioxidants-11-01955-s001.zip › antioxidants-1900564-tables.xlsx]

## Sheet: Supp Table S1
Name	Hits	Pop Hits	List Total	Pop Total	Genes	Pvalue	Adjusted Pvalue(BH)
GO:0006468_protein_phosphorylation	117	546	2547	18160	ACVRL1;BTK;CDK4;CIITA;PHKG2;IGFBP3;TGFB1;RARA;WNK3;SMAD1;DYRK3;ILK;PAK4;KALRN;SGK3;MARK2;DCLK2;ZAP70;MMD2;ACVR2B;LYN;BRD2;HIPK2;IRAK4;PAK3;MAPK9;ERG;ILF3;SQSTM1;IRAK3;IP6K3;NEK6;CDK6;GSK3B;WNK1;IKBKB;DCLK1;SGK2;MARK4;BMPR2;C8orf44-SGK3;CAMK2G;CAMK2B;CCNT1;PRKACB;ADM2;STK3;CDK9;CAMKK2;AKAP13;STK25;PDK1;MAP3K9;TLK2;CDC25B;CDK2;MAP4K2;EIF2A;MYLK;CAMK4;NEK9;TAOK3;CSNK2A1;HUS1;CSNK1D;CAMK2A;NEK5;CDC42…	0.0001	0.0618
GO:0035725_sodium_ion_transmembrane_transport	36	115	2547	18160	SCN5A;SCNN1B;SLC6A9;SCN1B;SCNN1G;SLC4A8;SLC6A2;ASIC1;SLC8A1;SLC8A3;SCN4B;TPCN1;SLC34A2;SLC6A13;SLC9A8;SCN10A;SLC6A11;SLC6A5;NALCN;SLC24A4;SLC6A20;SLC6A7;SLC8A2;SLC41A1;SLC24A5	0.0001	0.0618
GO:0008285_negative_regulation_of_cell_population_proliferation	95	442	2547	18160	ACVRL1;MEN1;NF2;PTEN;TSC1;VDR;WT1;CDKN1A;HNF4A;TP53;IGFBP3;NOS3;SOD2;TGFB1;ADRA1A;DRD2;OPRM1;SMAD2;SMAD1;RPS6KA2;ZBTB16;DNAJB2;FKTN;LYN;EIF2AK1;DDAH1;RBBP4;TP53INP1;ETS1;CDK6;ETV3;TENM1;DLG3;IL24;PTPRU;CDH13;RNF41;CDC6;STK3;NKX3-1;LIF;TP53I11;AMBRA1;SLIT3;GAS8;CSF1R;C18orf54;ING2;SRF;KLF13;F2R;LZTS2;FABP7;FABP3;TGFB3;ING5;RAPGEF2;ST18;BTG4;CDH5;DPT;FRK;PML;PTPN6;SFRP4;SFRP5;STRN;TFAP2B;FZD5;TRIM2…	0.0002	0.0742
GO:0030509_BMP_signaling_pathway	38	136	2547	18160	ACVRL1;TGFB1;SMAD2;SMAD1;TMEM100;ZFYVE16;ACVR2B;CHRDL1;SMAD3;RGMA;SMAD7;PDCD4;BMPR2;USP15;UBE2D3;HJV;DDX5;TGFB3;BMP10;BMP8A;GDF7	0.0003	0.0742
GO:0035556_intracellular_signal_transduction	90	416	2547	18160	BTK;LEP;IGFBP5;ADRA1A;WNK3;SMAD2;RPS6KA2;DGKK;KALRN;SGK3;MARK2;DCLK2;CARHSP1;NET1;ZAP70;CAB39L;DGKG;RGS9;LYN;MCF2L;ARHGEF7;IRAK4;TUFT1;TFRC;MAPK9;SQSTM1;IRAK3;PPP1R17;STMN1;GSK3B;NRG1;APBB2;ADCY10;NRG2;WNK1;RALGPS1;DCLK1;SGK2;MARK4;C8orf44-SGK3;RGS6;PPP1R1B;AKT2;STK3;EFS;RASA4B;TLK2;STAC3;MAP4K2;NFAM1;STK32C;PRKAR2A;SH3BP5L;CAMK4;MAP3K3;UNC13B;RAPGEF2;CDC42BPA;RP1;DGKD;CSPG4;PRKCB;MAPK6;PTPN6;SOC…	0.0003	0.0742
GO:0007399_nervous_system_development	72	330	2547	18160	MTR;PPT1;ATXN1;GDNF;CHRM1;NTRK3;SMARCB1;CPLX2;NAV3;KALRN;RBFOX2;WDPCP;FKTN;RGS9;KIF2A;LDB1;ARHGEF7;DLG4;ARHGAP26;TCF3;RBFOX1;CHRDL1;GFRA1;GPSM1;TIMM8A;NRG1;APAF1;IGF2BP1;TENM1;NAV1;ZC4H2;NRG2;DCLK1;DPYSL2;MARK4;NBL1;CAMK2G;MEF2D;SEMA4F;SRGAP2B;STMN3;IGSF9B;DPF3;OLFM1;NR2E1;NR2C2;MYT1L;FGF11;FRMD7;TCF12;BEND6;FABP7;FGF14;NRSN2;TYRO3;ST8SIA2;NAIP;CAMK1D;GDPD5;RAPGEF5;SIM1;EFNA5;OPHN1;ACVR1B;FEZ1;DL…	0.0008	0.1414
GO:0016925_protein_sumoylation	31	109	2547	18160	SUMO2;NUP58;ZNF451;POM121C;MDM2;STX1A;NUP93;POM121;SENP1;RANGAP1;SENP5;PIAS1;NUP107;BCL11A;TPR;UBE2I;CBX4;SENP2;MUL1;NUP43	0.0008	0.1414
GO:0032924_activin_receptor_signaling_pathway	12	25	2547	18160	ACVRL1;SMAD2;ACVR2B;SMAD3;BMPR2;HJV;ACVR1B;BMP10;GDF7	0.0011	0.1512
GO:0016055_Wnt_signaling_pathway	46	192	2547	18160	DRD2;HMGXB4;RYK;CTNNBIP1;DKK3;CSNK1G3;VPS26A;MARK2;CYLD;MCC;TLE3;AMER3;LDB1;TMEM131L;LRRFIP2;CALCOCO1;UBAC2;GSK3B;XIAP;HBP1;PAF1;BTRC;ARL6;NDRG2;C12orf43;AMOTL1;RNF43;LZTS2;CSNK2A1;CSNK1D;FBXW11;CSNK2A2;STRN;WNT2;SKP1;RBX1;ZRANB1;VPS35;SENP2;WNT4;ADGRA2;CCND1;WNT7B;OTULIN	0.0014	0.1546
GO:0016197_endosomal_transport	29	103	2547	18160	REPS2;SRL;ZFYVE16;AGAP2;TOM1;SQSTM1;RAB35;UBAP1;DCLK1;AP5S1;CLEC16A;ANKFY1;EPS15L1;VTA1;WASHC4;CHMP7;SNX27;ARHGAP1;ZFYVE9;AP5M1;VPS16;EHD4;CHMP4B	0.0014	0.1546
GO:2000300_regulation_of_synaptic_vesicle_exocytosis	17	47	2547	18160	ADRA1A;DRD2;SEPTIN5;PREPL;GSK3B;RIMS4;STXBP5L;CALM3;CALM1;P2RY1;PRKCB;SYP;RIMS3;LRRK2	0.0015	0.1546
GO:0000209_protein_polyubiquitination	69	324	2547	18160	BCL2;UBE2W;FBXW7;FBXO41;PELI3;PSMB11;FBXL19;RC3H2;PSMA4;UBE4B;UBE2K;NEDD4L;MDM2;FBXL20;UBE2G2;PSMC2;RNF41;SKP2;RNF165;BTRC;PSMD9;WWP2;FBXL4;FBXO31;NEDD4;UBE2D3;TRIM68;HECW2;LMO7;ARIH2;PPIL2;RBCK1;PSMC1;FBXW11;DCAF15;THOP1;UBE2B;UBE2N;CDC34;LNPEP;SKP1;FBXO22;RBX1;PRPF19;UBE2D4;UBE2J1;RLIM;FBXO40;KLHL42;MUL1;ZNRF1;FBXL16;FBXO27	0.0017	159
GO:0046033_AMP_metabolic_process	7	9	2547	18160	AMPD3;AK4;AK2;AK3;AMPD2	0.0018	159
GO:0030512_negative_regulation_of_transforming_growth_factor_beta_receptor_signaling_pathway	28	102	2547	18160	TP53;TGFB1;SMAD2;LDLRAD4;ZNF451;PBLD;PEG10;NKX2-1;FAM89B;SMAD3;CHST11;SMAD7;PMEPA1;ZBTB7A;TGFB3;WFIKKN2;BCL9L;HTRA1;PPM1A;RASL11B	0.0022	0.1732
GO:0045892_negative_regulation_of_transcription,_DNA-templated	122	647	2547	18160	NR3C1;MEN1;CIITA;ATXN1;VDR;WT1;HNF4A;TP53;TGFB1;RARA;SMAD2;PRAMEF9;ZBTB16;DKK3;BCL7A;SCMH1;RBFOX2;CALCA;NKX2-1;CHMP1A;FOXN3;TLE3;SMTNL1;MECP2;LDB1;GFI1;CBX5;CRY2;VGLL4;ZMYND15;RCOR3;ILF3;MDM2;KDM8;SIN3A;NONO;SOX6;NRG1;ADIPOQ;SF1;LIMS1;RUNX1T1;POU2F1;PDCD4;ZMYND11;MBD1;HDAC9;PRMT2;HINFP;NKX3-1;PRDM11;BTRC;CLOCK;WWP2;DPF3;SUV39H1;USP47;SCML4;ATF7IP;TNFSF4;BAHD1;CIC;KAT6A;PHC3;PRAMEF25;ZBTB7A;BEND6;…	0.0025	0.1732
GO:0006486_protein_glycosylation	31	119	2547	18160	FUT1;FUT3;ALG10B;B3GALNT1;MGAT1;B3GALT5;ST6GALNAC6;MPI;ST8SIA1;ST8SIA5;MAN2A2;ST8SIA2;ALG1;B4GALT6;LARGE1;EXTL3;B4GALT4;COG3;B3GNT5;B3GAT2	0.0026	0.1732
GO:0016311_dephosphorylation	27	99	2547	18160	PTEN;DUSP13;NT5DC3;DUSP28;PGP;G6PC2;ACP3;PTPRB;ACP5;ENTPD6;PHOSPHO1;NUDT16;NUDT16L1;NT5E;PTPRC;LPIN3;PFKFB4;HDHD2;ACP6;DUSP3;NT5M;PPM1A;NT5C1A;NT5C3B;NT5DC1	0.0028	0.1732
GO:0031571_mitotic_G1_DNA_damage_checkpoint	6	7	2547	18160	TP53;FBXO31;CDK2;RFWD3;RPS27L;CCND1	0.0028	0.1732
GO:0050862_positive_regulation_of_T_cell_receptor_signaling_pathway	9	17	2547	18160	RPS3;TESPA1;RAB29;CCR7;CD226;TRAT1;CARD11	0.0028	0.1732
GO:0016567_protein_ubiquitination	126	678	2547	18160	UBE2W;MED8;TRIM13;TRIM72;RNF187;FBXW7;RNF215;ZBTB16;KLHL7;CDC42;CUL4B;RNF169;KBTBD13;UBE2K;NEURL1B;NEDD4L;MDM2;CAND2;DCAF17;BIRC3;XIAP;DCAF1;RNF145;UBE2G2;ANAPC16;RNF41;PAF1;BTRC;KLHL3;WWP2;WDTC1;ZC3HC1;DCAF5;NEDD4;NEURL3;KLHL8;CDCA3;DTX4;UBE2D3;RNF121;TRIM35;TRIM68;HECW2;RNF43;LMO7;ARIH2;RNF157;TRIM39;RFWD3;PEX10;FBXW11;DCAF15;EPAS1;PML;UBE2B;UBE2N;SOCS1;TRIM24;CDC34;LRRC41;BRAP;TRIM10;SKP1;FBXO…	0.0033	0.1912
GO:0099149_regulation_of_postsynaptic_neurotransmitter_receptor_internalization	8	14	2547	18160	ITGB3;GSG1L;ATAD1;OPHN1	0.0034	0.1912
GO:0002040_sprouting_angiogenesis	13	34	2547	18160	NRP1;CDC42;JMJD6;ESM1;ANGPT1;PGF;CDH13;FLT4;THBS1;ADGRA2;OTULIN	0.0036	0.1936
GO:0048814_regulation_of_dendrite_morphogenesis	10	22	2547	18160	CHRNB2;NSMF;NEDD4L;GSK3B;NEDD4;NR2E1;HECW2;KNDC1;SDC2	0.0039	0.194
GO:0007506_gonadal_mesoderm_development	6	8	2547	18160	TSPY3;TSPY4;TSPY1;TSPY8;TSPY10;TSPY2	0.0043	0.194
GO:0010960_magnesium_ion_homeostasis	6	8	2547	18160	KCNA1;PTH;ANK3;TFAP2B;CNNM2	0.0043	0.194
GO:0010763_positive_regulation_of_fibroblast_migration	8	15	2547	18160	TGFB1;DDR2;SLC8A1;ARHGEF7;DMTN;PAK3;THBS1	0.0047	0.194
GO:0018105_peptidyl-serine_phosphorylation	47	213	2547	18160	BCL2;DYRK3;RPS6KA2;CSNK1G3;SGK3;MARK2;PNCK;SMTNL1;HIPK2;CDC7;MAPK9;NEK6;GSK3B;UHMK1;WNK1;IKBKB;DCLK1;SGK2;C8orf44-SGK3;AKT2;TLK2;CDK2;STK32C;CAMK4;CAMK1D;CSNK2A1;CSNK1D;CAMK2A;HIPK1;CSNK2A2;PRKCB;CDK5R1;RPS6KA3;PRKX;LRRK2	0.0047	0.194
GO:2000310_regulation_of_NMDA_receptor_activity	12	31	2547	18160	GRIA3;GRIN2A;GRIN2B;OPRM1;ACTN2;DLG4;DLG2;RASGRF1;DLG3;LRRC7;CNIH2	0.0047	0.194
GO:0031175_neuron_projection_development	32	131	2547	18160	MYOC;GDNF;PLP1;RYK;EPHA8;NCDN;LYN;MAP4;STMN1;RASGRF1;GSK3B;PPP1R9A;RAB35;UHMK1;RAB11A;STMN3;NEDD4;SRF;BLOC1S6;RAPGEF2;OPHN1;CDK5R1;POU4F1;BTG2;FRYL;HDGFL3;ATCAY	0.0052	0.194
GO:0007416_synapse_assembly	19	64	2547	18160	PTEN;DRD2;FARP1;RYK;DBNL;MECP2;SPOCK2;NRXN1;RAB29;SDK2;SLITRK1;ADGRL3;MAP1B;NRXN2;FZD5;POU4F1;SPTBN2	0.0053	0.194
GO:0051481_negative_regulation_of_cytosolic_calcium_ion_concentration	7	12	2547	18160	DRD2;ATP2B1;SLC8A1;SMAD3;LRP1;MTNR1B	0.0056	0.194
GO:0051646_mitochondrion_localization	7	12	2547	18160	MARK2;MFN2;MUL1;MFN1;LRRK2	0.0056	0.194
GO:0007179_transforming_growth_factor_beta_receptor_signaling_pathway	34	143	2547	18160	ACVRL1;TP53;TGFB1;SMAD2;SMAD1;HIPK2;LPXN;SMAD3;SMAD7;USP15;TGFB3;WFIKKN2;F11R;CDH5;PML;FOXH1;ZFYVE9;ZMIZ1	0.0057	0.194
GO:0034332_adherens_junction_organization	17	55	2547	18160	CDC42;AFDN;CADM1;CADM3;PVR;CADM2;CDH13;CTNNA1;CDHR3;EPHA4;CDH11;CDH10;CDH5	0.0058	0.194
GO:0043161_proteasome-mediated_ubiquitin-dependent_protein_catabolic_process	50	234	2547	18160	UBE2W;TRIM13;TRIM72;RNF187;FBXW7;PCBP2;PSMB11;FBXL19;PSMA4;UBE4B;UBE2K;TBL1X;NEDD4L;MDM2;PSMC2;SKP2;BTRC;PSMD9;ARMC8;CLOCK;WWP2;NEDD4;UBE2D3;HECW2;TBL1XR1;RBCK1;PSMC1;FBXW11;PML;UBE2B;CDC34;TBX21;RBX1;KLHL20;KLHL42;TNFAIP1;GID4;HECTD3;ZNRF1;SIAH3	0.0062	0.194
GO:0007411_axon_guidance	52	246	2547	18160	GDNF;CXCL12;NCAM1;GRB10;NFASC;RYK;SEMA3B;EPHA8;NRP1;KALRN;SCN1B;NKX2-1;NRXN3;NRXN1;GFRA1;PALLD;NEXN;NEO1;LMX1A;DPYSL2;UNC5B;MYPN;KLF7;SEMA4F;SLIT3;DRGX;CSF1R;ROBO4;BOC;EPHA4;DOK4;CNTN2;KIF5A;EFNB2;EFNA5;GRB2;OPHN1;PLCG1;SPTBN1;CDK5R1;FEZ1;DCC;EPHA3;SPTBN2;GAB2;SHC3;SEMA3G;GDF7	0.0064	0.194
GO:0008306_associative_learning	10	24	2547	18160	CHRNB2;DRD2;ACTR2;ASIC1;SRF;MAP1A;NPTX2;BTG2;SHANK1;CLN8	0.0064	0.194
GO:0000082_G1S_transition_of_mitotic_cell_cycle	28	112	2547	18160	CDK4;CDKN1A;RCC1;CUL4B;CDC7;CDK6;BCAT1;PHF8;SKP2;HINFP;CDC6;GPR132;MCM8;CDK2;PIAS1;RPA1;CAMK2A;ACVR1B;CDC34;MCM2;PIM2;CRLF3;USP37;CCND1	0.0065	0.194
GO:0035176_social_behavior	16	51	2547	18160	PTEN;ATXN1;CHRNB2;SEPTIN5;KALRN;NRXN3;MECP2;DLG4;NRXN1;NR2E1;CIC;NRXN2;MKKS;EIF4EBP2;SHANK1;CLN8	0.0065	0.194
GO:0034381_plasma_lipoprotein_particle_clearance	5	6	2547	18160	LDLR;SCARB1;MSR1	0.0069	0.194
GO:0043372_positive_regulation_of_CD4-positive,_alpha-beta_T_cell_differentiation	5	6	2547	18160	NCKAP1L;ZBTB7B;TNFSF4;SOCS1;SASH3	0.0069	0.194
GO:1901016_regulation_of_potassium_ion_transmembrane_transporter_activity	5	6	2547	18160	CACNA1D;NEDD4L;FHL1;WWP2;NEDD4	0.0069	0.194
GO:0000165_MAPK_cascade	56	271	2547	18160	FGFR3;MEN1;IL2RA;GDNF;CCR5;NCAM1;TGFB1;GRIN2B;KITLG;SMAD1;MBP;RASA4;PSMB11;PSMA4;ACTN2;PAK3;DLG4;DLG2;LAMTOR2;GFRA1;RASGRF1;ANGPT1;RASGRP4;NRG1;DLG3;NRG2;PSMC2;IL31RA;PSMD9;CAMKK2;RASGEF1A;PEA15;PPM1L;PSMC1;MAP3K3;MAP2K6;LRRC7;TAOK3;RAPGEF2;PABPN1;CALM1;FGF7;FGF9;GRB2;MAPK6;SPTBN1;MAP3K14;RASAL2;BRAP;SPTBN2;RBX1;SHC3;LRRK2	0.0072	0.1951
GO:0006865_amino_acid_transport	15	47	2547	18160	SLC7A2;SLC25A29;SLC38A1;SLC7A7;SLC1A4;SFXN5;SLC17A5;SLC6A20;SLC7A1;SLC16A10;SLC7A14	0.0073	0.1951
GO:0002244_hematopoietic_progenitor_cell_differentiation	16	52	2547	18160	TP53;TGFB1;ADAR;SLC8A3;SIN3A;FLT1;PTPRC;CSF1R;CIAO3;SERPINB12;ACP6;HOXB3;FLT4;PTPN6;TNFRSF13B;ZNF784	0.0075	0.1951
GO:0045860_positive_regulation_of_protein_kinase_activity	17	57	2547	18160	CDKN1A;CSF1;DDR2;MMD2;AGAP2;PPP1R9A;PTPRC;CDC25B;TAB2;CCR7;MAPRE3;RAPGEF2;TRAF4;CCL19;RASSF2	0.0077	0.1951
GO:0002028_regulation_of_sodium_ion_transport	8	17	2547	18160	DRD2;NKAIN2;SLC8A1;WNK1;NKAIN3;NKAIN4;NKAIN1;SIK1	0.0082	0.1951
GO:0032695_negative_regulation_of_interleukin-12_production	9	21	2547	18160	LILRB1;CMKLR1;IRAK3;CCR7;THBS1;TIGIT	0.0082	0.1951
GO:0035871_protein_K11-linked_deubiquitination	8	17	2547	18160	TNFAIP3;YOD1;OTUD7A;OTUD7B;USP37	0.0082	0.1951
GO:1900181_negative_regulation_of_protein_localization_to_nucleus	8	17	2547	18160	CLDN18;SIN3A;GSK3B;DCLK1;CTNNA1;LZTS2;TRIM29;OTUD7B	0.0082	0.1951
GO:0034765_regulation_of_ion_transmembrane_transport	28	115	2547	18160	CACNA1E;KCNJ5;KCNJ2;KCNMA1;KCNC1;CLIC5;TPCN1;NEDD4L;CLCN2;KCNA2;KCNJ16;WWP2;NEDD4;SCN10A;NALCN;KCND3;KCNH1;KCNK5;KCNQ4;KCNK6;KCNK10;KCNK12;KCNA7;KCNG3;KCNH5;KCNG4;TMEM37	0.0087	0.2031
GO:0006688_glycosphingolipid_biosynthetic_process	6	10	2547	18160	ST8SIA1;ST8SIA5;A4GALT;B4GALT6;LARGE1	0.0093	0.2049
GO:0070508_cholesterol_import	6	10	2547	18160	LDLR;SCARB1;STARD5	0.0093	0.2049
GO:0030154_cell_differentiation	111	611	2547	18160	VDR;EXT2;HNF4A;RARA;SMAD2;SMAD1;ETV3L;EDA;NTRK3;PPDPFL;CPLX2;TNK2;SOHLH1;FXR1;NHSL2;NPNT;PEG10;TSPY3;ZAP70;NKX2-1;TDRKH;KIF2A;CADM1;NHLH2;LYN;ADCYAP1R1;C14orf93;RAB29;NHS;ERG;SYT2;SQSTM1;ETS1;CHRDL1;NEDD4L;SMAD3;ETV3;ELF1;GPSM1;ANGPT1;FHL1;NRG1;APAF1;ETV1;TSPY4;SMAD7;PTPRU;TSPY1;CAMK2G;PGF;ETV7;ELF5;TSPY8;ETS2;NKX3-1;AMBRA1;ZFP41;MEF2D;MMP19;ELF2;SOHLH2;SUV39H1;NDRG2;TSPY10;EYA3;BOLL;NR2E1;TBC1D2…	0.0094	0.2049
GO:0000724_double-strand_break_repair_via_homologous_recombination	29	122	2547	18160	RECQL5;SWI5;RAD51D;FAN1;RAD51;AP5S1;MCM8;RAD52;MRE11;RPA1;HUS1;SAMHD1;RFWD3;UBE2N;ERCC4;ZFYVE26;NUCKS1	0.0101	0.2049

## Sheet: Suppl Table S2
GeneTrail2
Statistical analysis of molecular signatures
M.ora.zip
ConsensusPathDB_-_Wikipathways
Type	Name	Number of hits	Expected score	Adjusted p-value
depleted	Olfactory receptor activity	7	99.6796	5.87315e-26
enriched	miR-targeted genes in lymphocytes - TarBase	181	116.198	0.00113987
enriched	miR-targeted genes in muscle cell - TarBase	149	93.6989	0.00298178
enriched	Ras Signaling	94	52.403	0.00427465
enriched	EGF-EGFR Signaling Pathway	83	45.8526	0.00765972
enriched	VEGFA-VEGFR2 Signaling Pathway	111	67.2126	0.00765972
ConsensusPathDB_-_KEGG
Type	Name	Number of hits	Expected score	Adjusted p-value
depleted	Olfactory transduction - Homo sapiens (human)	24	125.596	2.15459e-21
enriched	Axon guidance - Homo sapiens (human)	90	49.8398	0.00422117
enriched	Pathways in cancer - Homo sapiens (human)	214	149.235	0.00422117
depleted	Systemic lupus erythematosus - Homo sapiens (human)	12	37.5935	0.00422117
enriched	MAPK signaling pathway - Homo sapiens (human)	131	84.0157	0.00835006
enriched	MicroRNAs in cancer - Homo sapiens (human)	77	42.7198	0.00992615
enriched	Ras signaling pathway - Homo sapiens (human)	107	66.0734	0.0100481
enriched	Focal adhesion - Homo sapiens (human)	91	56.675	0.0404702
ConsensusPathDB_-_Signalink
Type	Name	Number of hits	Expected score	Adjusted p-value
enriched	EGF-Core	55	29.9039	0.0131236
ConsensusPathDB_-_HumanCyc
Type	Name	Number of hits	Expected score	Adjusted p-value
ConsensusPathDB_-_PharmGKB
Type	Name	Number of hits	Expected score	Adjusted p-value
Reactome_-_Pathways
Type	Name	Number of hits	Expected score	Adjusted p-value
depleted	Olfactory Signaling Pathway	10	111.641	8.94759e-27
depleted	Keratinization	7	43.2894	1.80494e-06
depleted	Formation of the cornified envelope	12	36.7391	0.0471446
KEGG_-_Pathways
Type	Name	Number of hits	Expected score	Adjusted p-value
depleted	Olfactory transduction	24	121.04	5.69354e-20
enriched	Axon guidance	92	51.5486	0.00381971
enriched	Pathways in cancer	216	150.659	0.00381971
depleted	Systemic lupus erythematosus	12	37.8783	0.00381971
enriched	MAPK signaling pathway	131	83.7309	0.00778975
enriched	MicroRNAs in cancer	81	45.8526	0.00973443
enriched	Ras signaling pathway	107	65.7886	0.00973443
depleted	Staphylococcus aureus infection	8	27.0559	0.0221612
enriched	Focal adhesion	91	56.675	0.0379959
enriched	Regulation of actin cytoskeleton	95	60.6622	0.0493354
miRTarBase_-_Validated_targets_with_strong_evidence
Type	Name	Number of hits	Expected score	Adjusted p-value
enriched	hsa-miR-125b-5p	77	33.3215	6.55729e-05
enriched	hsa-miR-155-5p	111	63.5102	0.00234331
enriched	hsa-miR-145-5p	73	40.4415	0.0284196
enriched	hsa-miR-29b-3p	54	26.4863	0.0284196
GO_-_Cellular_Component
Type	Name	Number of hits	Expected score	Adjusted p-value
depleted	intermediate filament	12	55.5358	6.12142e-07
enriched	cell junction	501	365.112	2.28779e-06
depleted	extracellular space	290	404.415	3.89146e-05
enriched	neuron projection	385	276.825	3.89146e-05
enriched	cell projection	582	458.526	0.000314851
enriched	perinuclear region of cytoplasm	277	193.663	0.000356949
enriched	plasma membrane bounded cell projection	556	436.597	0.000356949
depleted	keratin filament	4	26.4863	0.000624599
enriched	synapse	331	244.927	0.00138311
enriched	Golgi apparatus	362	273.407	0.00187507
enriched	postsynaptic specialization	121	73.1933	0.00351291
enriched	synaptic membrane	135	84.8701	0.0044004
enriched	postsynaptic density	119	72.6237	0.00484999
enriched	nuclear body	297	221.574	0.00501234
enriched	Golgi membrane	270	199.074	0.00530722
enriched	dendrite	179	121.894	0.00530722
enriched	endosome	236	169.74	0.00530722
enriched	cell-cell junction	180	124.457	0.00920794
enriched	adherens junction	212	151.798	0.00990433
enriched	cytoplasmic vesicle	468	379.922	0.0136442
depleted	extracellular region	411	503.809	0.0136442
enriched	intracellular vesicle	469	381.061	0.0136442
enriched	chromatin	378	299.324	0.014162
enriched	postsynaptic membrane	96	58.6686	0.0190424
enriched	nuclear chromatin	335	263.154	0.0216829
enriched	catalytic complex	437	357.138	0.0305456
enriched	glutamatergic synapse	147	101.388	0.0305456
enriched	postsynapse	103	65.7886	0.0339232
ConsensusPathDB_-_SMPDB
Type	Name	Number of hits	Expected score	Adjusted p-value
GO_-_Biological_Process
Type	Name	Number of hits	Expected score	Adjusted p-value
depleted	detection of chemical stimulus involved in sensory perception	7	127.875	6.89315e-35
depleted	detection of chemical stimulus involved in sensory perception of smell	7	113.92	4.1901e-30
depleted	detection of chemical stimulus	17	137.558	2.97378e-29
depleted	detection of stimulus involved in sensory perception	21	143.823	2.37302e-28
depleted	detection of stimulus	59	185.404	2.18079e-19
depleted	G protein-coupled receptor signaling pathway	219	357.423	2.66169e-09
enriched	regulation of cell differentiation	692	507.227	4.80724e-09
depleted	keratinization	7	51.5486	6.32511e-09
enriched	positive regulation of transcription, DNA-templated	605	434.603	8.55245e-09
enriched	positive regulation of RNA biosynthetic process	630	459.666	2.09892e-08
enriched	positive regulation of nucleic acid-templated transcription	630	459.381	2.09892e-08
enriched	regulation of intracellular signal transduction	688	511.499	2.83682e-08
enriched	intracellular signal transduction	611	455.963	7.91211e-07
enriched	positive regulation of signal transduction	626	469.349	7.91211e-07
enriched	phosphorylation	460	327.804	1.45106e-06
enriched	protein phosphorylation	382	262.585	1.62397e-06
enriched	regulation of neurogenesis	342	229.263	1.62397e-06
enriched	positive regulation of cell differentiation	393	271.983	1.63697e-06
enriched	negative regulation of biosynthetic process	580	433.464	2.02664e-06
enriched	regulation of nervous system development	375	258.028	2.20632e-06
enriched	positive regulation of protein metabolic process	628	477.038	2.66559e-06
enriched	regulation of phosphorus metabolic process	652	499.253	3.28552e-06
enriched	regulation of neuron differentiation	280	183.98	1.06562e-05
enriched	negative regulation of signaling	508	377.359	1.0966e-05
enriched	positive regulation of cellular protein metabolic process	588	447.989	1.18112e-05
depleted	defense response to bacterium	21	65.219	1.2956e-05
enriched	anatomical structure morphogenesis	533	400.427	1.37073e-05
enriched	regulation of phosphorylation	583	444.571	1.37073e-05
enriched	negative regulation of gene expression	617	475.329	1.55331e-05
depleted	sensory perception of chemical stimulus	12	48.7006	1.82427e-05
enriched	regulation of cell projection organization	285	191.385	2.91973e-05
enriched	negative regulation of signal transduction	470	348.879	3.06557e-05
enriched	actin filament-based process	188	113.92	3.56731e-05
enriched	negative regulation of nucleic acid-templated transcription	469	348.879	3.69555e-05
enriched	actin cytoskeleton organization	169	99.3948	3.72753e-05
enriched	negative regulation of RNA biosynthetic process	469	349.448	4.05512e-05
enriched	regulation of protein phosphorylation	530	402.991	4.05512e-05
enriched	regulation of plasma membrane bounded cell projection organization	280	188.822	4.32629e-05
depleted	sensory perception of smell	8	39.3023	4.56006e-05
enriched	positive regulation of cell development	237	154.076	4.79597e-05
enriched	positive regulation of protein modification process	462	344.322	4.79597e-05
enriched	negative regulation of transcription, DNA-templated	451	334.924	4.86613e-05
enriched	positive regulation of catalytic activity	524	399.858	6.13309e-05
enriched	regulation of neuron projection development	219	140.691	7.28418e-05
enriched	positive regulation of transcription by RNA polymerase II	452	338.056	8.57268e-05
enriched	protein localization	696	556.212	0.000101857
enriched	regulation of cell morphogenesis	215	138.982	0.000130282
enriched	cytoskeleton organization	345	247.49	0.000138795
enriched	macromolecule localization	699	561.908	0.000181431
depleted	defense response to Gram-positive bacterium	3	25.9167	0.000257154
enriched	negative regulation of transcription by RNA polymerase II	337	244.642	0.000450216
enriched	positive regulation of neurogenesis	204	133.286	0.000450216
enriched	positive regulation of neuron differentiation	168	104.806	0.000517062
enriched	regulation of kinase activity	333	241.794	0.000517062
enriched	regulation of cellular component movement	375	278.818	0.000624779
enriched	positive regulation of phosphorylation	395	296.476	0.000654889
enriched	regulation of locomotion	372	277.394	0.000840184
enriched	regulation of axonogenesis	98	52.403	0.000898692
enriched	regulation of cell motility	349	257.743	0.000898692
enriched	regulation of organelle organization	461	356.283	0.00094884
enriched	regulation of cell migration	327	239.516	0.00107366
enriched	positive regulation of cell projection organization	170	108.793	0.00131672
enriched	regulation of Ras protein signal transduction	117	67.4974	0.00144516
enriched	cell differentiation	648	526.878	0.00145257
enriched	positive regulation of protein phosphorylation	373	281.951	0.00200742
enriched	positive regulation of intracellular signal transduction	374	283.66	0.00242566
enriched	regulation of protein kinase activity	301	220.15	0.00242566
enriched	protein autophosphorylation	97	53.827	0.00298164
enriched	positive regulation of kinase activity	231	161.481	0.00309066
enriched	regulation of small GTPase mediated signal transduction	151	95.9772	0.00329924
enriched	vesicle-mediated transport	572	462.229	0.00329924
depleted	defense response to Gram-negative bacterium	3	21.9295	0.00377696
enriched	negative regulation of intracellular signal transduction	205	140.691	0.00407682
enriched	regulation of cellular localization	303	224.991	0.00526792
enriched	regulation of protein localization	373	286.223	0.00526792
enriched	animal organ morphogenesis	210	145.817	0.00549468
enriched	cell projection organization	303	225.846	0.00651959
enriched	positive regulation of neuron projection development	129	80.3133	0.00689732
enriched	intracellular transport	514	413.813	0.00690222
enriched	cellular response to organic substance	489	392.168	0.00822976
enriched	enzyme linked receptor protein signaling pathway	262	191.385	0.00822976
enriched	regulation of cell cycle	422	332.076	0.00835264
enriched	transmembrane receptor protein tyrosine kinase signaling pathway	203	141.83	0.00964143
enriched	positive regulation of protein kinase activity	212	149.519	0.00990922
enriched	regulation of developmental growth	143	92.5597	0.0101385
enriched	regulation of protein serine/threonine kinase activity	204	142.969	0.0103056
enriched	positive regulation of cellular component movement	216	153.507	0.0114215
enriched	regulation of cell population proliferation	552	451.406	0.0114215
enriched	regulation of cellular protein localization	214	151.798	0.0114215
enriched	regulation of MAPK cascade	281	209.327	0.0114606
enriched	protein modification by small protein conjugation	288	216.162	0.0139253
enriched	cell junction assembly	84	47.2766	0.0143955
enriched	anatomical structure formation involved in morphogenesis	271	201.922	0.0158239
enriched	signal transduction by protein phosphorylation	153	102.243	0.0171986
enriched	peptidyl-amino acid modification	314	240.37	0.0194299
enriched	positive regulation of locomotion	218	157.209	0.0200319
enriched	establishment of protein localization	512	418.654	0.0210446
enriched	positive regulation of cell migration	200	142.115	0.0210446
enriched	regulation of cytoskeleton organization	208	149.235	0.0230417
enriched	positive regulation of cell population proliferation	331	256.319	0.0232866
enriched	regulation of membrane potential	174	120.755	0.0241854
enriched	regulation of cell adhesion	256	191.1	0.0265901
enriched	positive regulation of cell motility	207	149.235	0.0289376
enriched	regulation of actin filament-based process	154	104.806	0.030127
enriched	positive regulation of programmed cell death	245	182.271	0.0315265
enriched	cell-cell junction organization	70	38.4479	0.0329762
enriched	positive regulation of protein serine/threonine kinase activity	141	94.5533	0.033984
enriched	protein ubiquitination	258	193.948	0.033984
enriched	regulation of actin cytoskeleton organization	141	94.5533	0.033984
enriched	regulation of dendrite development	76	43.0046	0.033984
enriched	animal organ development	440	356.283	0.0341624
enriched	negative regulation of protein phosphorylation	163	113.065	0.0369902
enriched	peptidyl-serine phosphorylation	82	47.8462	0.0379104
enriched	regulation of cell death	566	472.197	0.0379104
enriched	positive regulation of organelle organization	233	172.873	0.0381013
enriched	MAPK cascade	139	93.4141	0.0391495
enriched	positive regulation of apoptotic process	242	180.847	0.0392834
enriched	cellular response to organonitrogen compound	174	122.748	0.0407621
enriched	negative regulation of phosphorylation	175	123.603	0.0407621
enriched	protein transport	481	395.016	0.0413166
enriched	regulation of axon extension	54	27.3407	0.0413166
enriched	negative regulation of Ras protein signal transduction	35	14.5247	0.0456932
enriched	positive regulation of cell death	258	195.657	0.0467723
depleted	response to bacterium	54	91.4205	0.0467723
enriched	regulation of Wnt signaling pathway	149	102.528	0.0496854
depleted	antimicrobial humoral response	10	30.1887	0.0496892
GO_-_Molecular_Function
Type	Name	Number of hits	Expected score	Adjusted p-value
depleted	olfactory receptor activity	7	113.92	1.70763e-30
depleted	G protein-coupled receptor activity	95	237.807	1.60204e-18
enriched	purine ribonucleoside triphosphate binding	682	509.505	5.92433e-08
enriched	adenyl nucleotide binding	589	433.179	1.85379e-07
enriched	ATP binding	565	413.528	2.11027e-07
enriched	kinase binding	311	207.334	3.69637e-06
enriched	drug binding	625	481.595	9.68261e-06
depleted	transmembrane signaling receptor activity	239	349.164	9.68261e-06
enriched	phosphotransferase activity, alcohol group as acceptor	280	187.683	2.40709e-05
enriched	cytoskeletal protein binding	381	274.546	4.2215e-05
enriched	kinase activity	298	204.77	4.41294e-05
enriched	protein kinase activity	239	158.918	0.000122861
enriched	double-stranded DNA binding	372	272.837	0.000200007
enriched	protein domain specific binding	282	196.511	0.000200007
enriched	protein kinase binding	267	183.98	0.000200007
enriched	DNA-binding transcription factor activity, RNA polymerase II-specific	412	310.146	0.000338203
enriched	sequence-specific double-stranded DNA binding	339	247.205	0.000357339
enriched	DNA-binding transcription factor activity	485	375.935	0.000430043
enriched	actin binding	183	118.761	0.000706007
enriched	GTPase binding	217	146.956	0.000781629
enriched	transcription regulatory region DNA binding	357	266.287	0.000798316
enriched	protein serine/threonine kinase activity	181	119.616	0.00168471
enriched	sequence-specific DNA binding	428	332.36	0.00185785
enriched	transcription factor binding	261	188.252	0.00270321
enriched	transcription regulatory region sequence-specific DNA binding	314	233.82	0.00270321
enriched	RNA polymerase II regulatory region sequence-specific DNA binding	295	218.726	0.00368221
enriched	small GTPase binding	180	121.324	0.00368221
enriched	RNA polymerase II regulatory region DNA binding	296	220.719	0.00476398
enriched	cadherin binding	142	91.4205	0.00525225
enriched	DNA-binding transcription activator activity	176	120.47	0.00801896
enriched	proximal promoter sequence-specific DNA binding	215	153.222	0.00801896
enriched	DNA-binding transcription activator activity, RNA polymerase II-specific	175	120.185	0.00915541
enriched	RNA polymerase II proximal promoter sequence-specific DNA binding	209	148.665	0.00915541
enriched	Ras GTPase binding	171	117.052	0.00952433
depleted	signaling receptor activity	326	412.104	0.0111119
enriched	cell adhesion molecule binding	196	139.551	0.0151765
enriched	transcription coregulator activity	216	159.772	0.0380425
ConsensusPathDB_-_BioCarta
Type	Name	Number of hits	Expected score	Adjusted p-value
WikiPathways
Type	Name	Number of hits	Expected score	Adjusted p-value
enriched	EGF/EGFR Signaling Pathway	83	45.8526	0.0155667
enriched	Ras Signaling	94	52.403	0.0155667
enriched	VEGFA-VEGFR2 Signaling Pathway	111	67.2126	0.0155667
ConsensusPathDB_-_PID
Type	Name	Number of hits	Expected score	Adjusted p-value
ConsensusPathDB_-_EHMN
Type	Name	Number of hits	Expected score	Adjusted p-value
HumanCyc
Type	Name	Number of hits	Expected score	Adjusted p-value
ConsensusPathDB_-_INOH
Type	Name	Number of hits	Expected score	Adjusted p-value
enriched	EPO signaling	92	52.6878	0.00396137
enriched	IL-7 signaling	91	52.403	0.00396137
enriched	VEGF	91	53.2574	0.00421529
enriched	JAK STAT pathway and regulation	128	88.0029	0.0295102
enriched	PDGF	30	12.816	0.0324652
ConsensusPathDB_-_Reactome
Type	Name	Number of hits	Expected score	Adjusted p-value
depleted	Olfactory Signaling Pathway	10	116.768	1.7684e-28
depleted	G alpha (s) signalling events	48	157.779	2.33891e-17
depleted	GPCR downstream signalling	207	325.525	2.73942e-07
depleted	Signaling by GPCR	229	343.468	3.04221e-06
depleted	Antimicrobial peptides	3	27.6255	0.000129753
enriched	Axon guidance	165	101.388	0.000540957
depleted	Reproduction	5	29.3343	0.000747626
depleted	Meiosis	2	21.9295	0.00104201
enriched	Signaling by Receptor Tyrosine Kinases	181	120.47	0.0054054
enriched	Diseases of signal transduction	117	70.6301	0.00901341
depleted	SIRT1 negatively regulates rRNA expression	3	19.6511	0.0259445
depleted	Keratinization	13	37.0239	0.0316716
depleted	PRC2 methylates histones and DNA	4	21.0751	0.0346231
depleted	DNA methylation	3	18.7967	0.0374652
enriched	Membrane Trafficking	226	165.468	0.0374652
ConsensusPathDB_-_NetPath
Type	Name	Number of hits	Expected score	Adjusted p-value
enriched	EGFR1	213	129.299	3.24733e-07

## Sheet: Suppl Table S3
Biological process	BP p-value	Genes	miRNA
gene silencing by RNA	0.00127491957749051	RAE1	hsa-miR-145-5p
gene silencing by RNA	0.00127491957749051	DICER1;FMR1;AGO2;POLR2F	hsa-miR-125b-5p
gene silencing by RNA	0.00127491957749051	DDX4;NUP43	hsa-miR-155-5p
protein targeting to ER	0.00474279796382018	RPL37	hsa-miR-145-5p
protein targeting to ER	0.00474279796382018	RPL35A;RPL24;RPL38;RPL18A	hsa-miR-29b-3p
protein targeting to ER	0.00474279796382018	ZFAND2B	hsa-miR-4732-3p
establishment of RNA localization	0.0086751394589603	SRSF9;RAE1;UPF3A	hsa-miR-145-5p
establishment of RNA localization	0.0086751394589603	FMR1	hsa-miR-125b-5p
establishment of RNA localization	0.0086751394589603	NUP43	hsa-miR-155-5p
regulation of transmembrane transport	0.0100798186350584	RAE1;PDE4D;KCNB1;CAB39;ANK3;CLCN3	hsa-miR-145-5p
regulation of transmembrane transport	0.0100798186350584	IL13;BCL2;GRIN2B;CACNA1D;FMR1;HOMER1	hsa-miR-125b-5p
regulation of transmembrane transport	0.0100798186350584	MAPK14;BSND	hsa-miR-29b-3p
regulation of transmembrane transport	0.0100798186350584	NUP43;SLC30A1;CLCN5;OSR1	hsa-miR-155-5p
regulation of transmembrane transport	0.0100798186350584	GSTM2;KCNK6;KCNMB1	hsa-miR-4732-3p
fat cell differentiation	0.0145159042300611	METTL8;ZADH2	hsa-miR-145-5p
fat cell differentiation	0.0145159042300611	GRK5;LAMA4	hsa-miR-125b-5p
fat cell differentiation	0.0145159042300611	CBY1;INSIG1;MAPK14	hsa-miR-29b-3p
fat cell differentiation	0.0145159042300611	ARL6;ASXL1;ARNTL;ASXL2	hsa-miR-155-5p
fat cell differentiation	0.0145159042300611	PEX11A	hsa-miR-4732-3p
posttranscriptional regulation of gene expression	0.0268660033901231	PPP1R15A;EIF4EBP2;EIF3L;UPF3A;ANGEL2	hsa-miR-145-5p
posttranscriptional regulation of gene expression	0.0268660033901231	FMR1;AGO2;EIF3H;DICER1;TNPO1;PSMD9	hsa-miR-125b-5p
posttranscriptional regulation of gene expression	0.0268660033901231	EIF2S1;RPL38;MAPK14	hsa-miR-29b-3p
posttranscriptional regulation of gene expression	0.0268660033901231	PCBP4	hsa-miR-4732-3p
glycosyl compound metabolic process	0.0285744104340556	NAGA	hsa-miR-125b-5p
glycosyl compound metabolic process	0.0285744104340556	MTAP	hsa-miR-29b-3p
glycosyl compound metabolic process	0.0285744104340556	NME2	hsa-miR-155-5p
glycosyl compound metabolic process	0.0285744104340556	NUDT18	hsa-miR-4732-3p
mitotic nuclear division	0.0436310405940768	RAE1;CHEK1	hsa-miR-145-5p
mitotic nuclear division	0.0436310405940768	CDC23;GOLGA2	hsa-miR-125b-5p
mitotic nuclear division	0.0436310405940768	PINX1;RPL24	hsa-miR-29b-3p
mitotic nuclear division	0.0436310405940768	NUP43	hsa-miR-155-5p
adaptive immune response based on somatic recombination of immune receptors built from immunoglobulin superfamily domains	0.0454437332619069	CLEC4G;SWAP70	hsa-miR-145-5p
adaptive immune response based on somatic recombination of immune receptors built from immunoglobulin superfamily domains	0.0454437332619069	POU2F2;GAPT;TLR4	hsa-miR-125b-5p
adaptive immune response based on somatic recombination of immune receptors built from immunoglobulin superfamily domains	0.0454437332619069	SERPING1	hsa-miR-29b-3p
adaptive immune response based on somatic recombination of immune receptors built from immunoglobulin superfamily domains	0.0454437332619069	DENND1B;APLF	hsa-miR-155-5p
actin cytoskeleton reorganization	0.0408878036483567	S1PR2	hsa-miR-145-5p
actin cytoskeleton reorganization	0.0408878036483567	PARVG	hsa-miR-125b-5p
actin cytoskeleton reorganization	0.0408878036483567	INSRR;RALA;PARVA;TNIK	hsa-miR-29b-3p
chromatin assembly or disassembly	0.0334375351933599	SMARCC1;CENPL	hsa-miR-145-5p
chromatin assembly or disassembly	0.0334375351933599	TSPYL1	hsa-miR-125b-5p
chromatin assembly or disassembly	0.0334375351933599	CENPV	hsa-miR-29b-3p
chromatin assembly or disassembly	0.0334375351933599	SMARCA5	hsa-miR-155-5p
positive regulation of response to biotic stimulus	0.0275165967569537	MAVS;MUC1	hsa-miR-145-5p
positive regulation of response to biotic stimulus	0.0275165967569537	TLR4;PSMD9;LAMP1	hsa-miR-125b-5p
positive regulation of response to biotic stimulus	0.0275165967569537	MUC7;UBE2K	hsa-miR-29b-3p
positive regulation of response to biotic stimulus	0.0275165967569537	CRTAM	hsa-miR-4732-3p
positive regulation of innate immune response	0.0275165967569537	MAVS;MUC1	hsa-miR-145-5p
positive regulation of innate immune response	0.0275165967569537	TLR4;PSMD9;LAMP1	hsa-miR-125b-5p
positive regulation of innate immune response	0.0275165967569537	MUC7;UBE2K	hsa-miR-29b-3p
positive regulation of innate immune response	0.0275165967569537	CRTAM	hsa-miR-4732-3p
protein lipidation	0.0255752022660391	NMT2	hsa-miR-145-5p
protein lipidation	0.0255752022660391	SPRN;GOLGA7B	hsa-miR-125b-5p
protein lipidation	0.0255752022660391	CPM;ULBP2;PIGH;ZDHHC5	hsa-miR-29b-3p
protein lipidation	0.0255752022660391	ZDHHC2	hsa-miR-155-5p
lipoprotein biosynthetic process	0.0255752022660391	NMT2	hsa-miR-145-5p
lipoprotein biosynthetic process	0.0255752022660391	SPRN;GOLGA7B	hsa-miR-125b-5p
lipoprotein biosynthetic process	0.0255752022660391	CPM;ULBP2;PIGH;ZDHHC5	hsa-miR-29b-3p
lipoprotein biosynthetic process	0.0255752022660391	ZDHHC2	hsa-miR-155-5p
